# Supplementary material for: In vivo evaluation of the antinociceptive effects of novel methylsulfonyl group-containing compounds
Source: publisher site journal article supplement (doi:10.1515/znc-2024-0210), 2025-02-07
Supplement: Supplementary file 1 [file j_znc-2024-0210_suppl_001.docx]

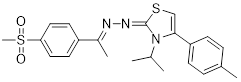

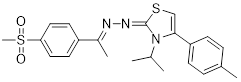

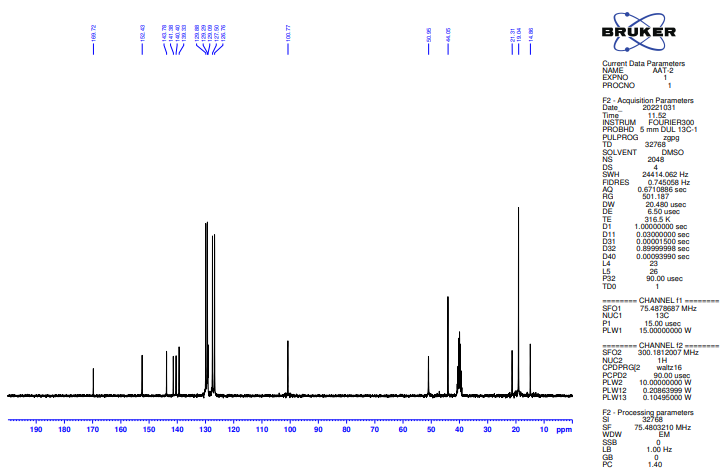

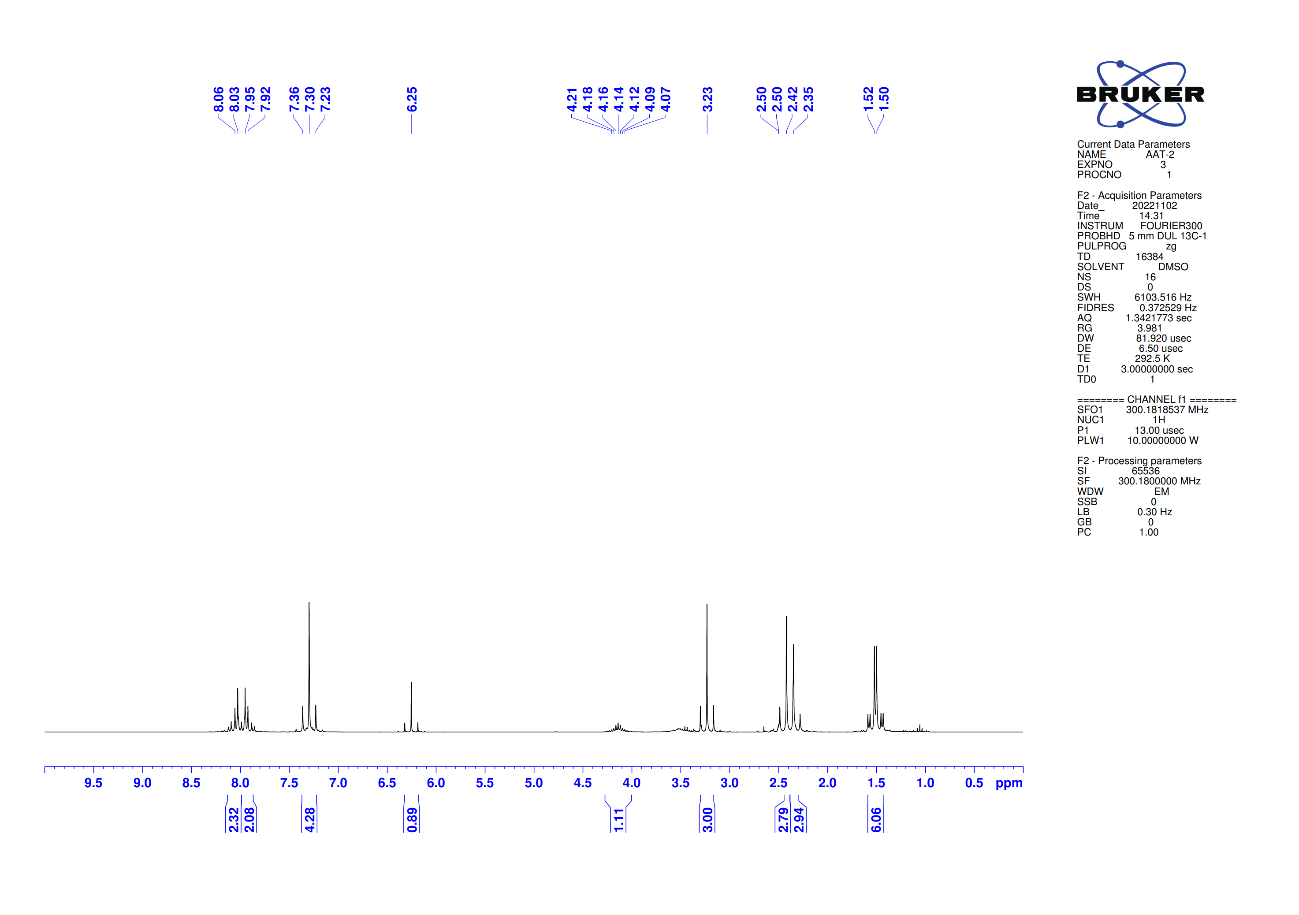
Figure S1. 1H-NMR spectrum of compound 3a

Figure S2. 13C-NMR spectrum of compound 3a


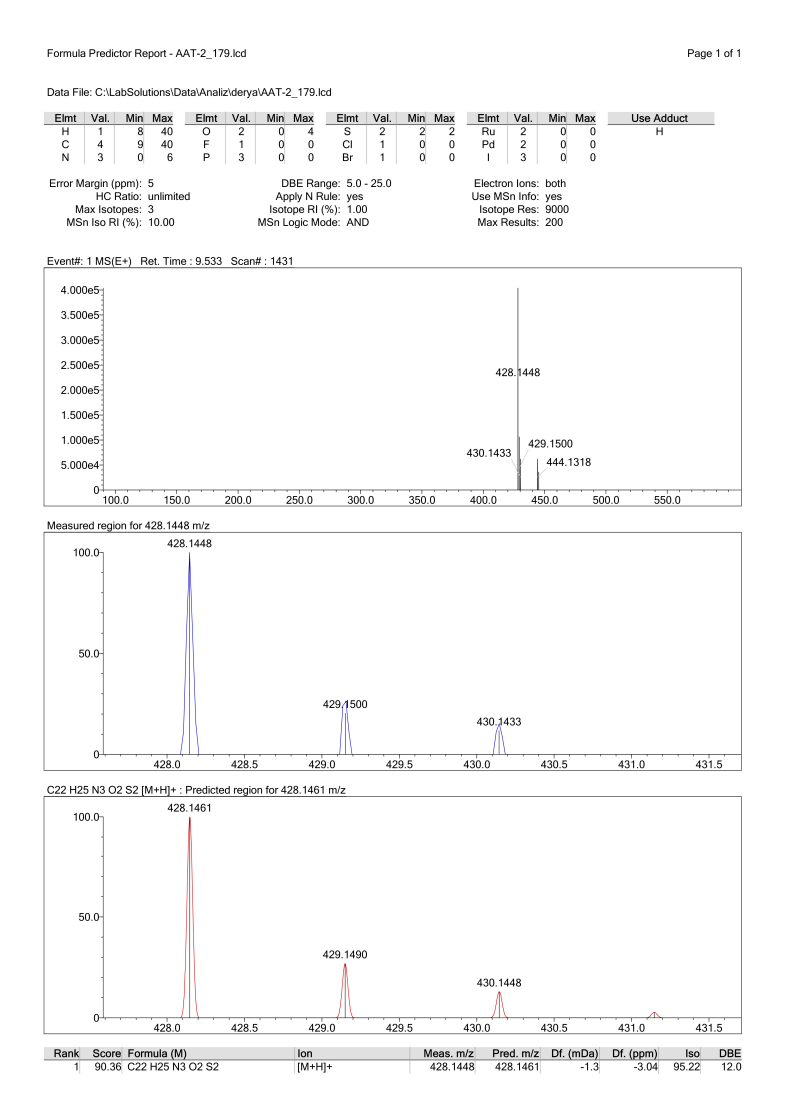


Figure S3. HRMS spectrum of compound 3a


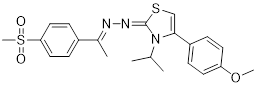

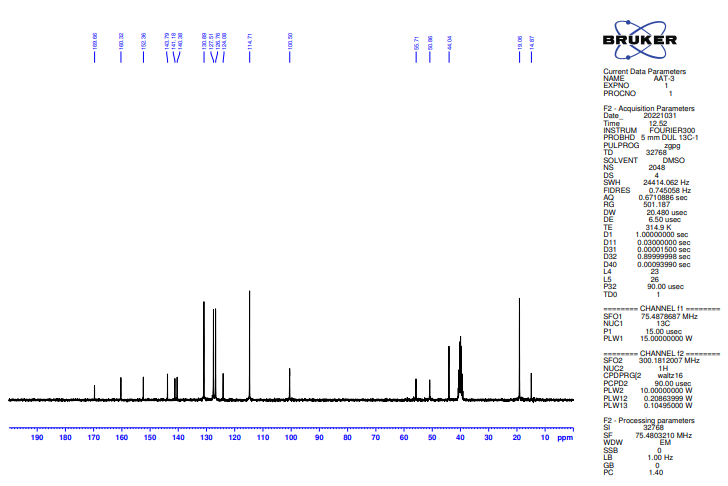

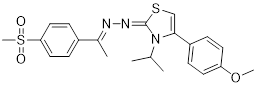

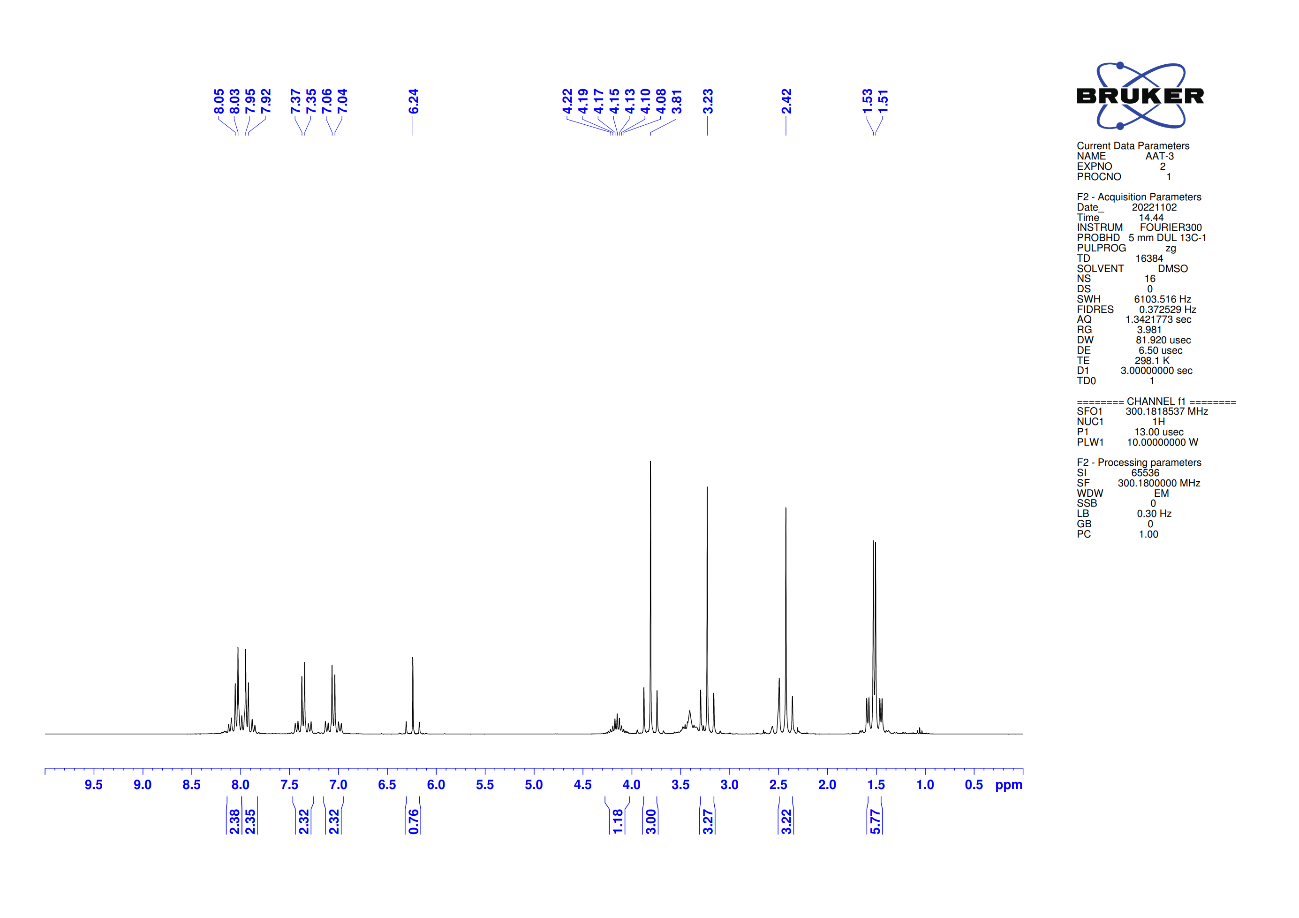

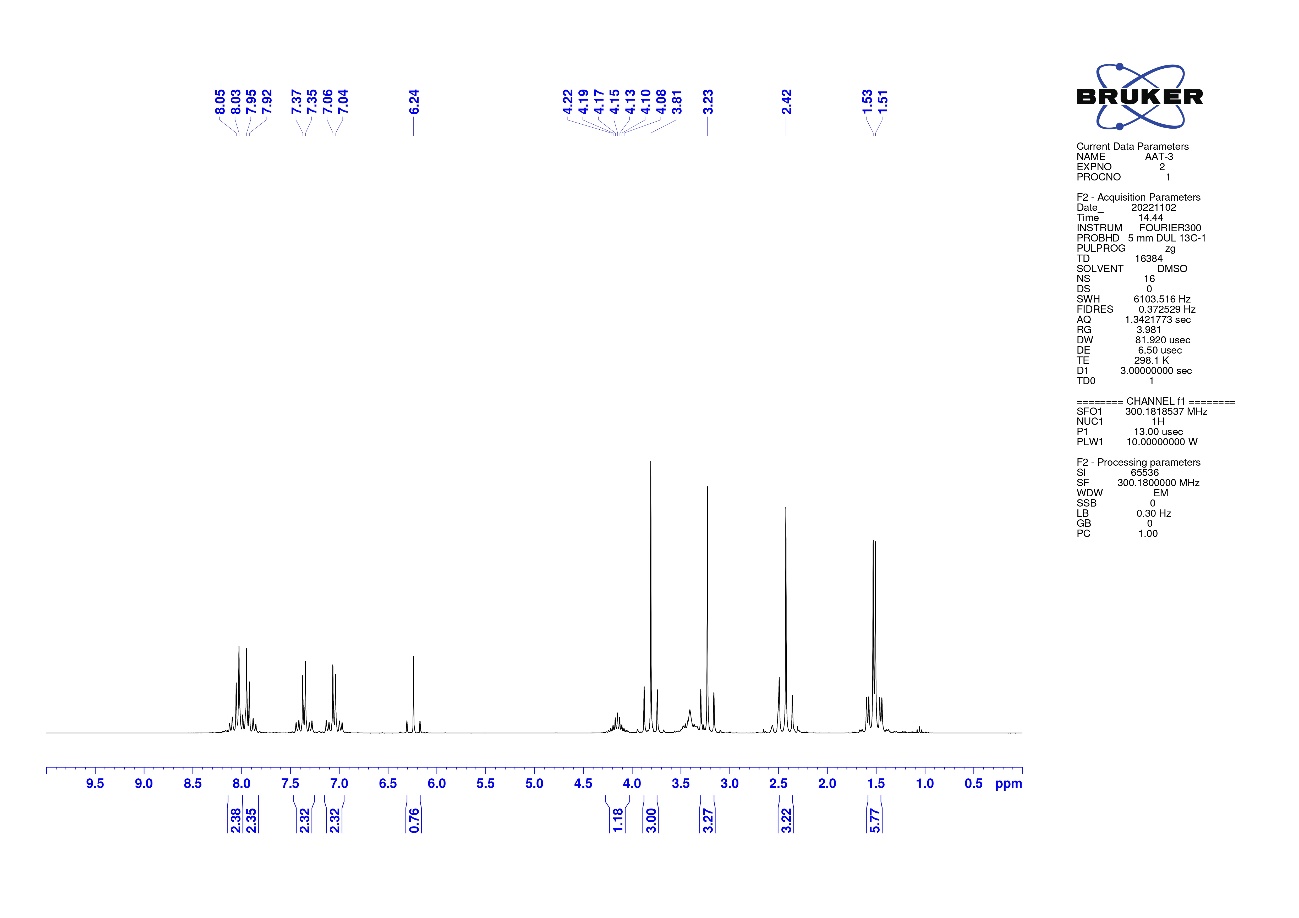
**Figure S4.** 1H-NMR spectrum of compound 3b

Figure S5. 13C-NMR spectrum of compound 3b


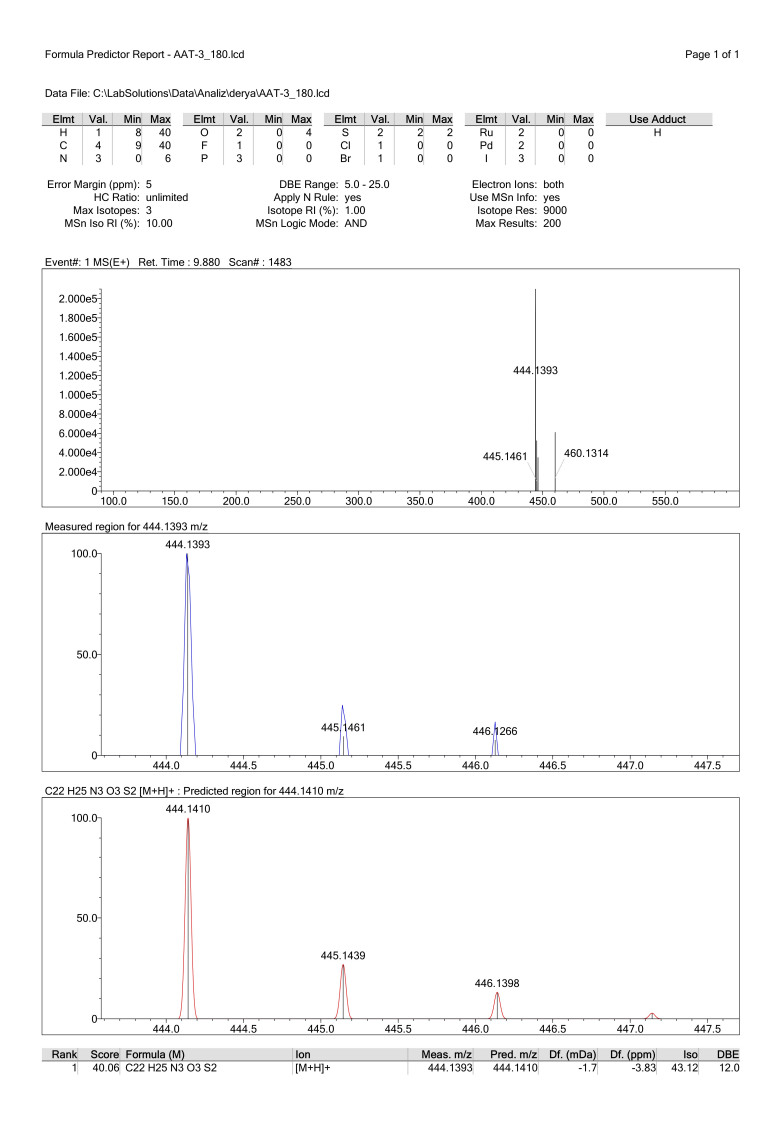


Figure S6. HRMS spectrum of compound 3b

**
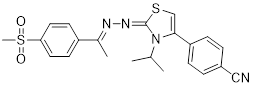
**
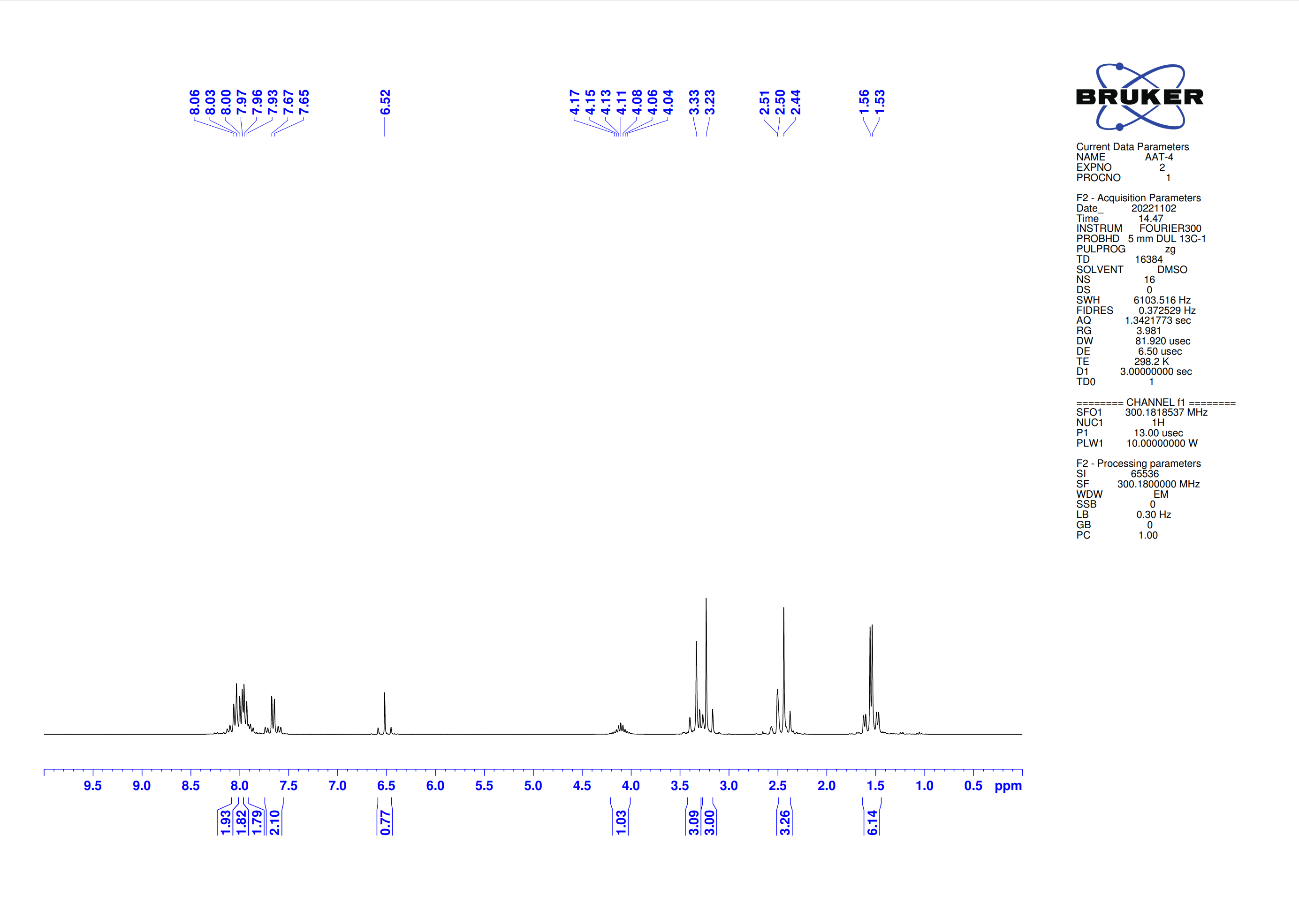
**Figure S7.** 1H-NMR spectrum of compound **3c**


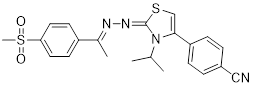


**
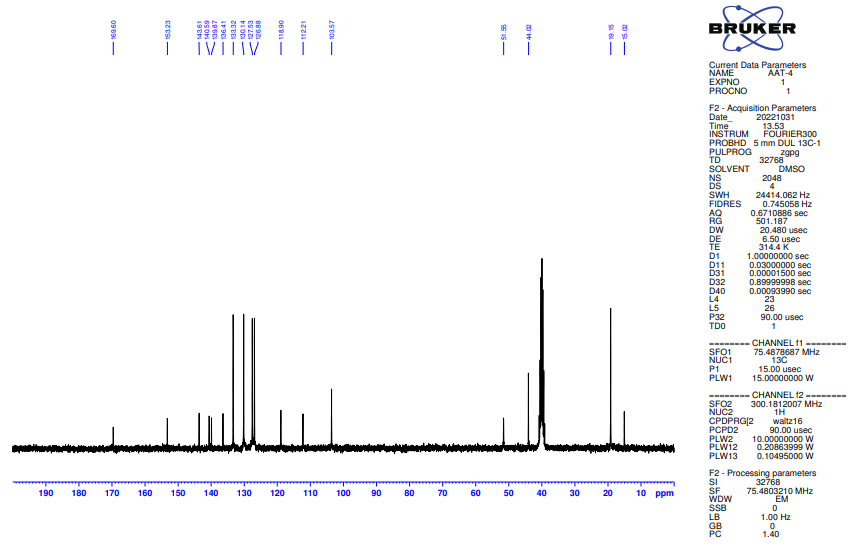
****Figure S8.** 1H-NMR spectrum of compound **3c**


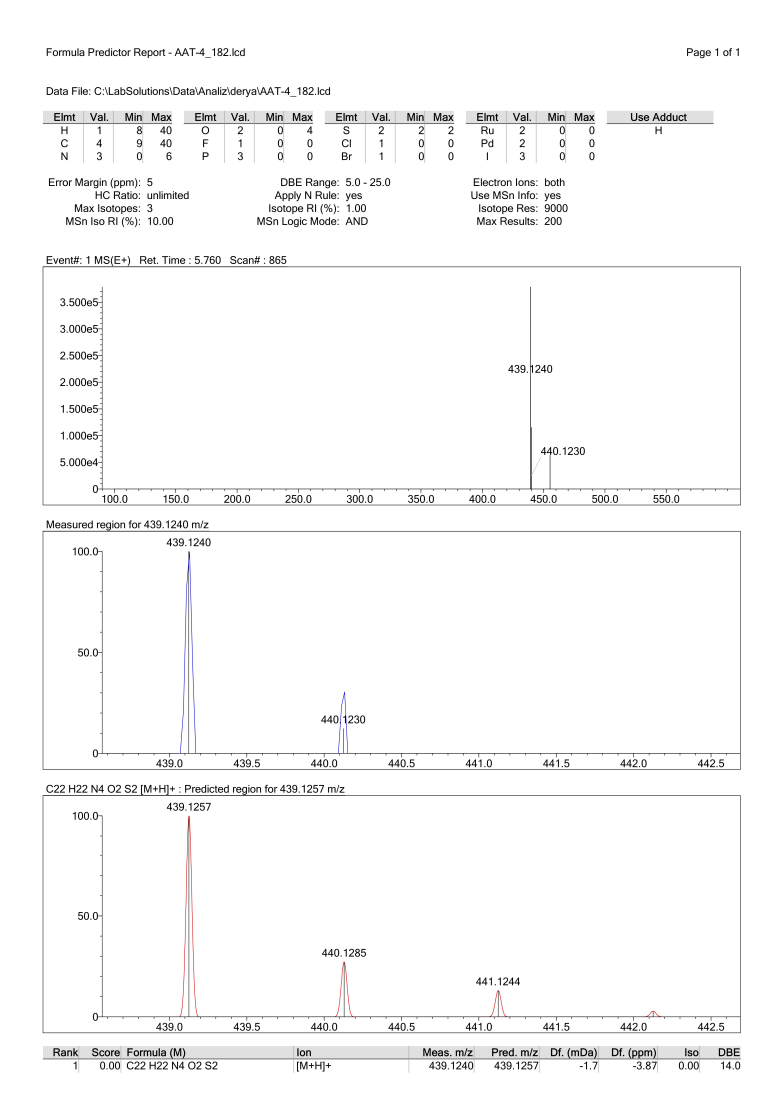


**Figure S9.** HRMS spectrum of compound 3c


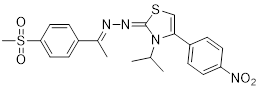

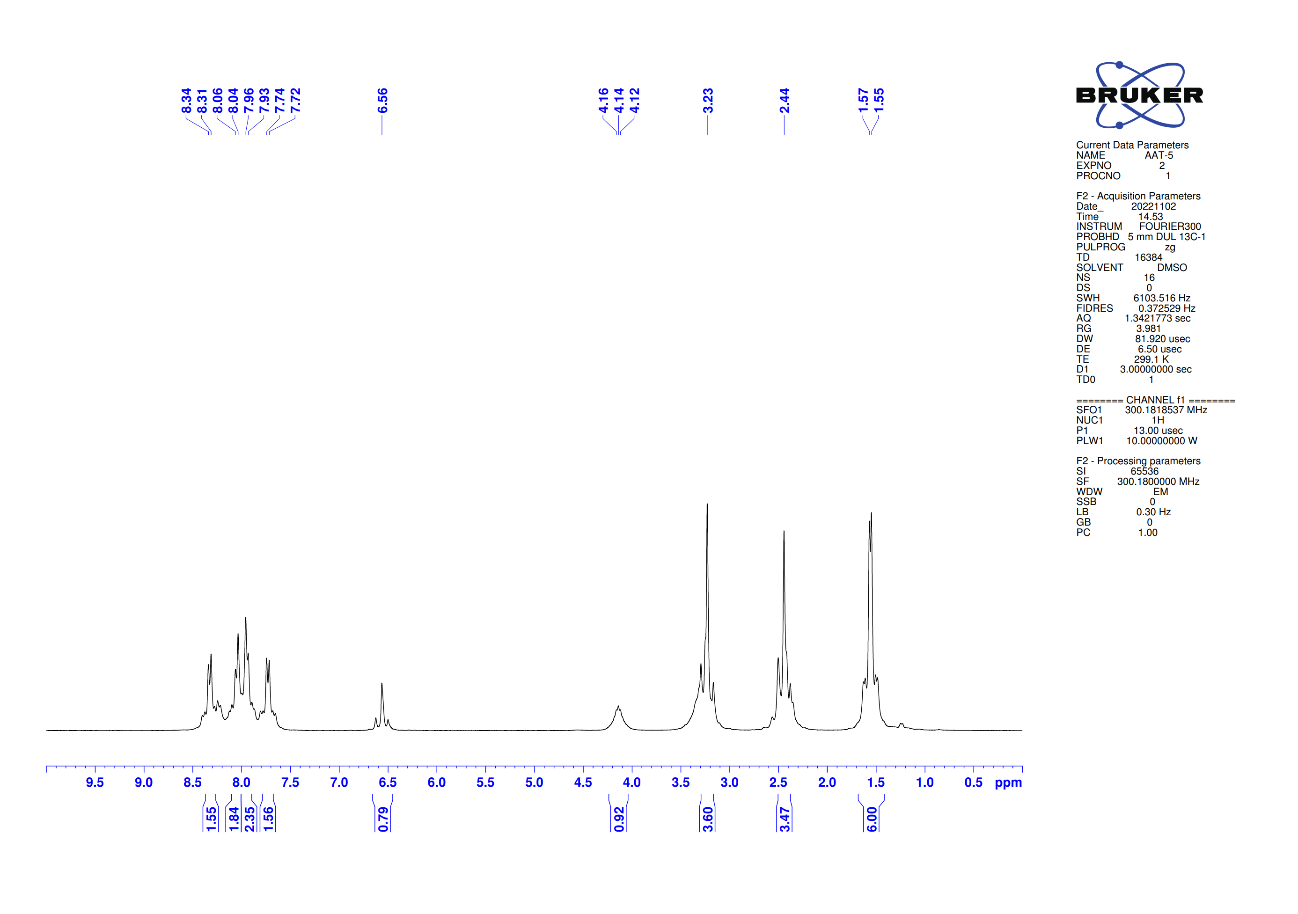
**Figure S10.** 1H-NMR spectrum of compound 3d

**
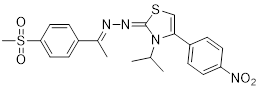
**
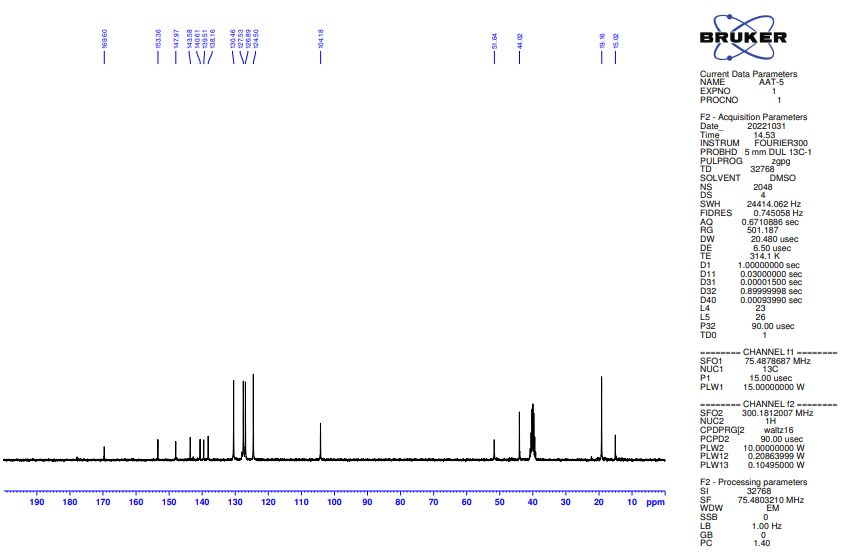


**Figure S11.** 13C-NMR spectrum of compound 3d


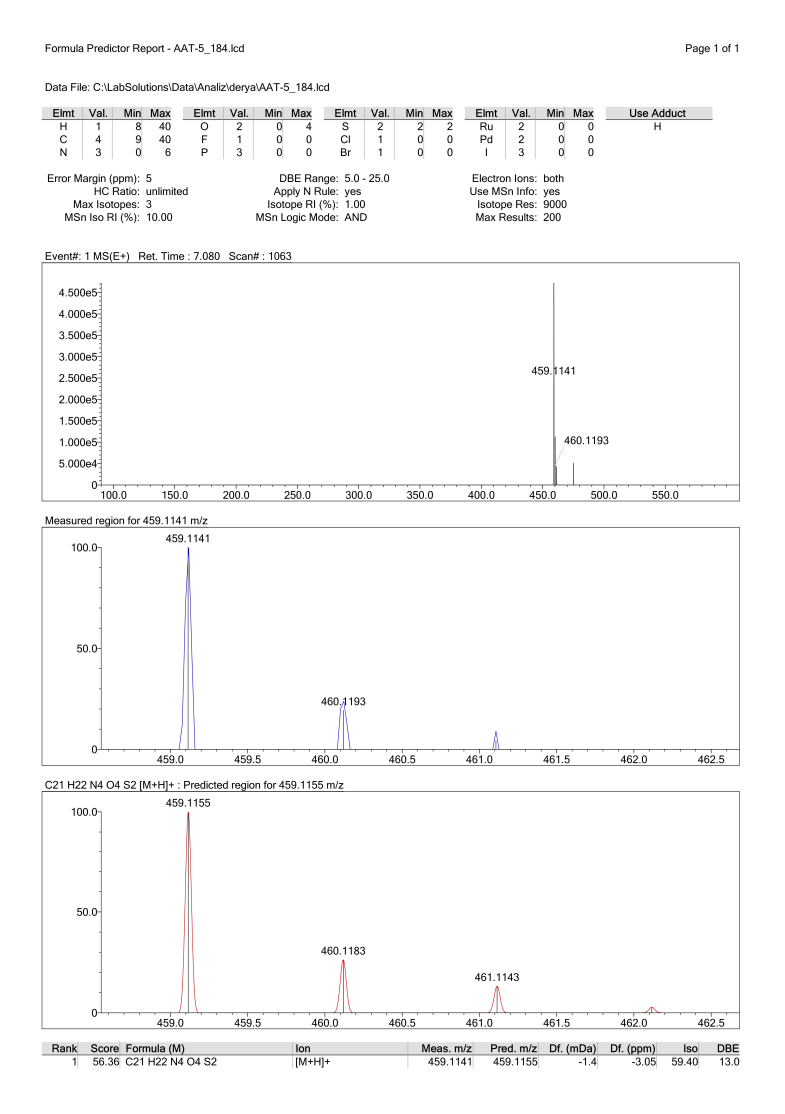


**Figure S12.** HRMS spectrum of compound 3d


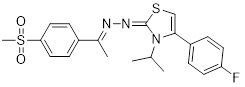

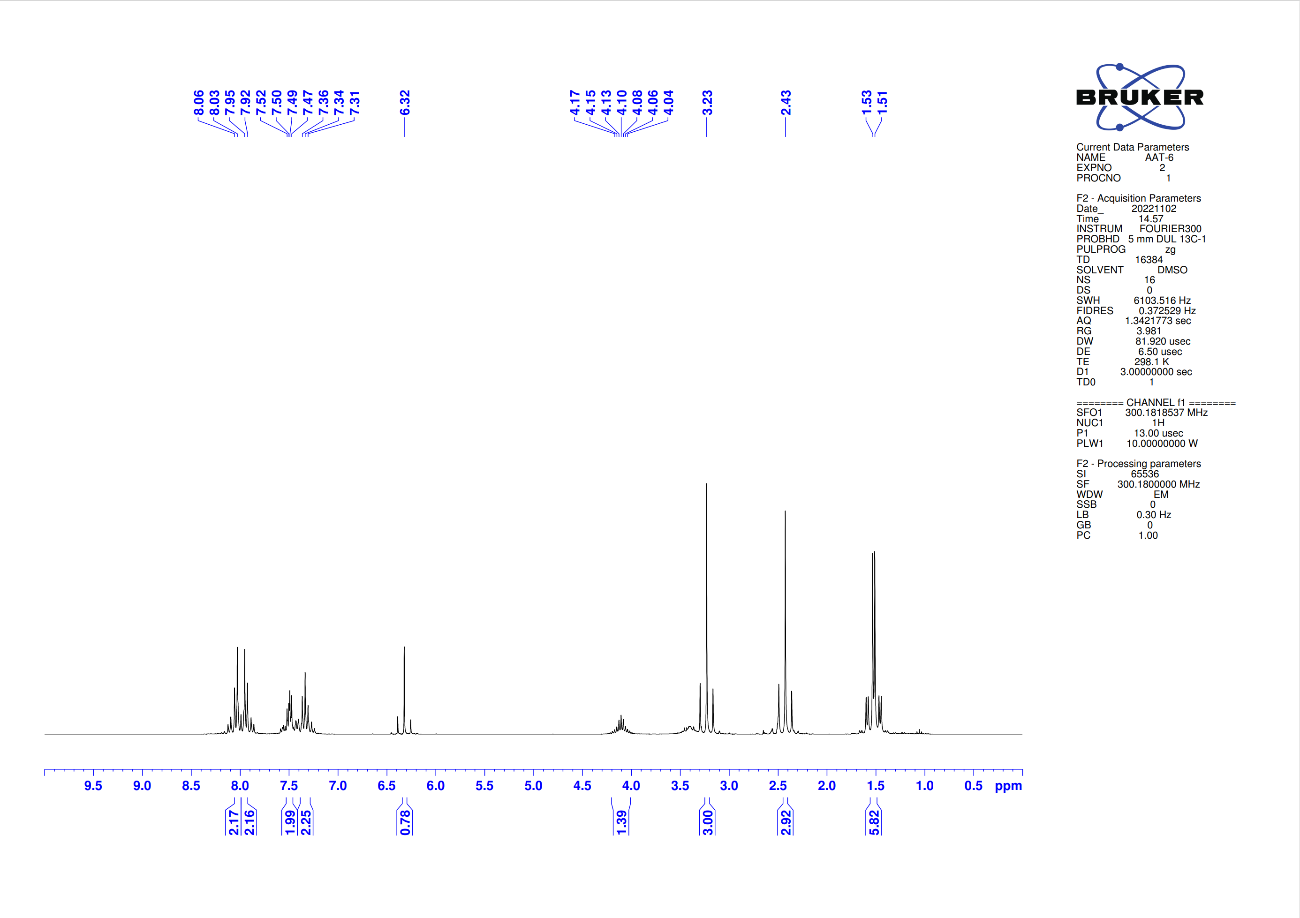
**Figure S13.** 1H-NMR spectrum of compound 3e

**
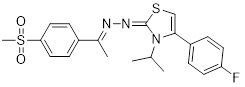
**
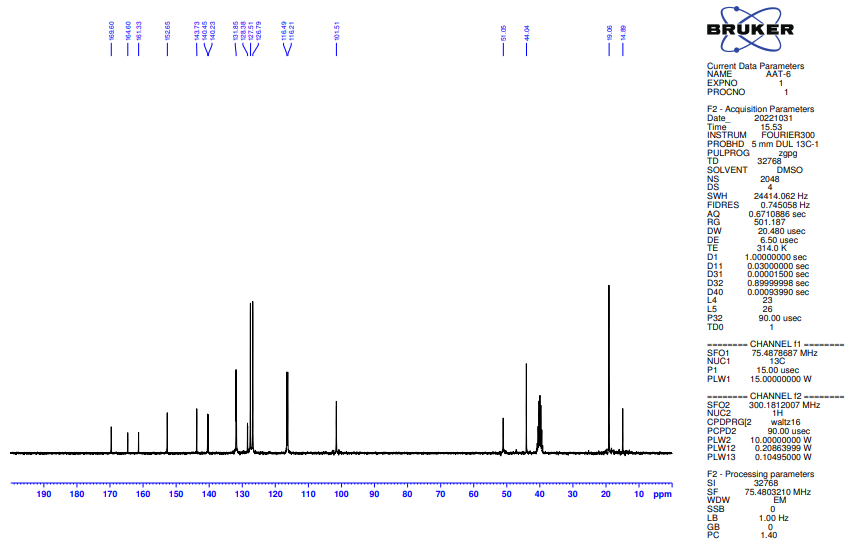


**Figure S14.** 13C-NMR spectrum of compound 3e


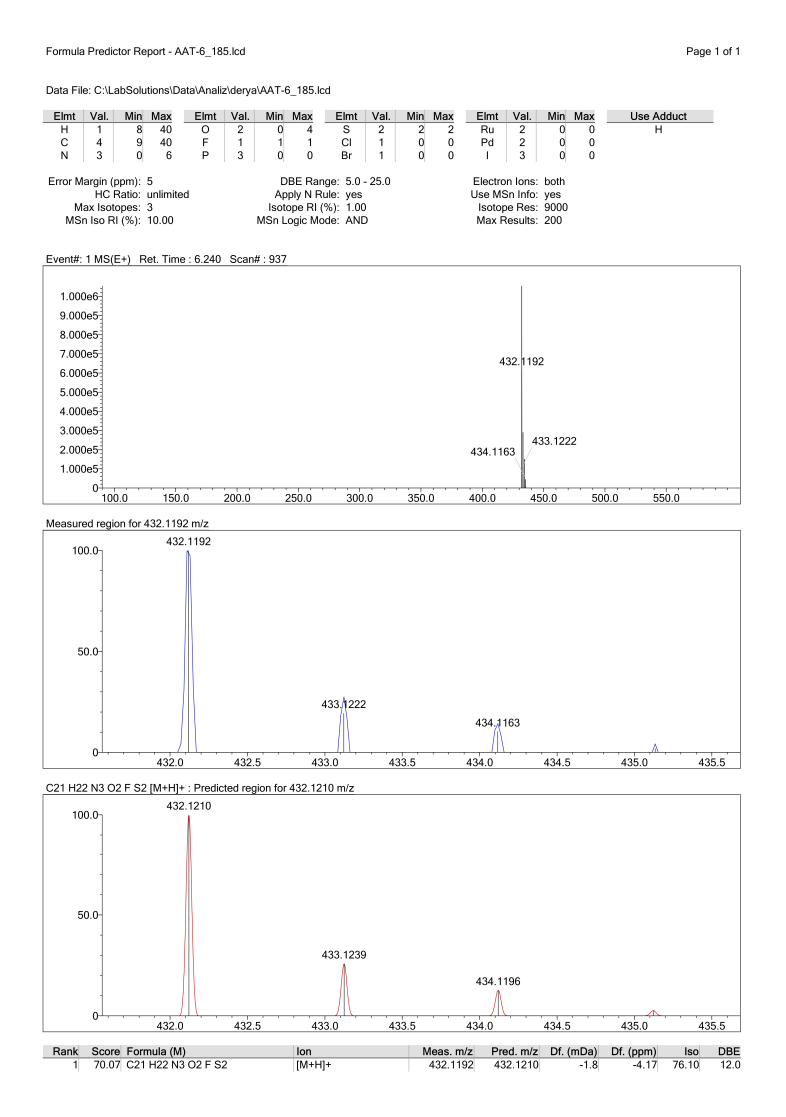


**Figure S15.** HRMS spectrum of compound 3e


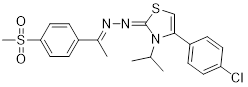

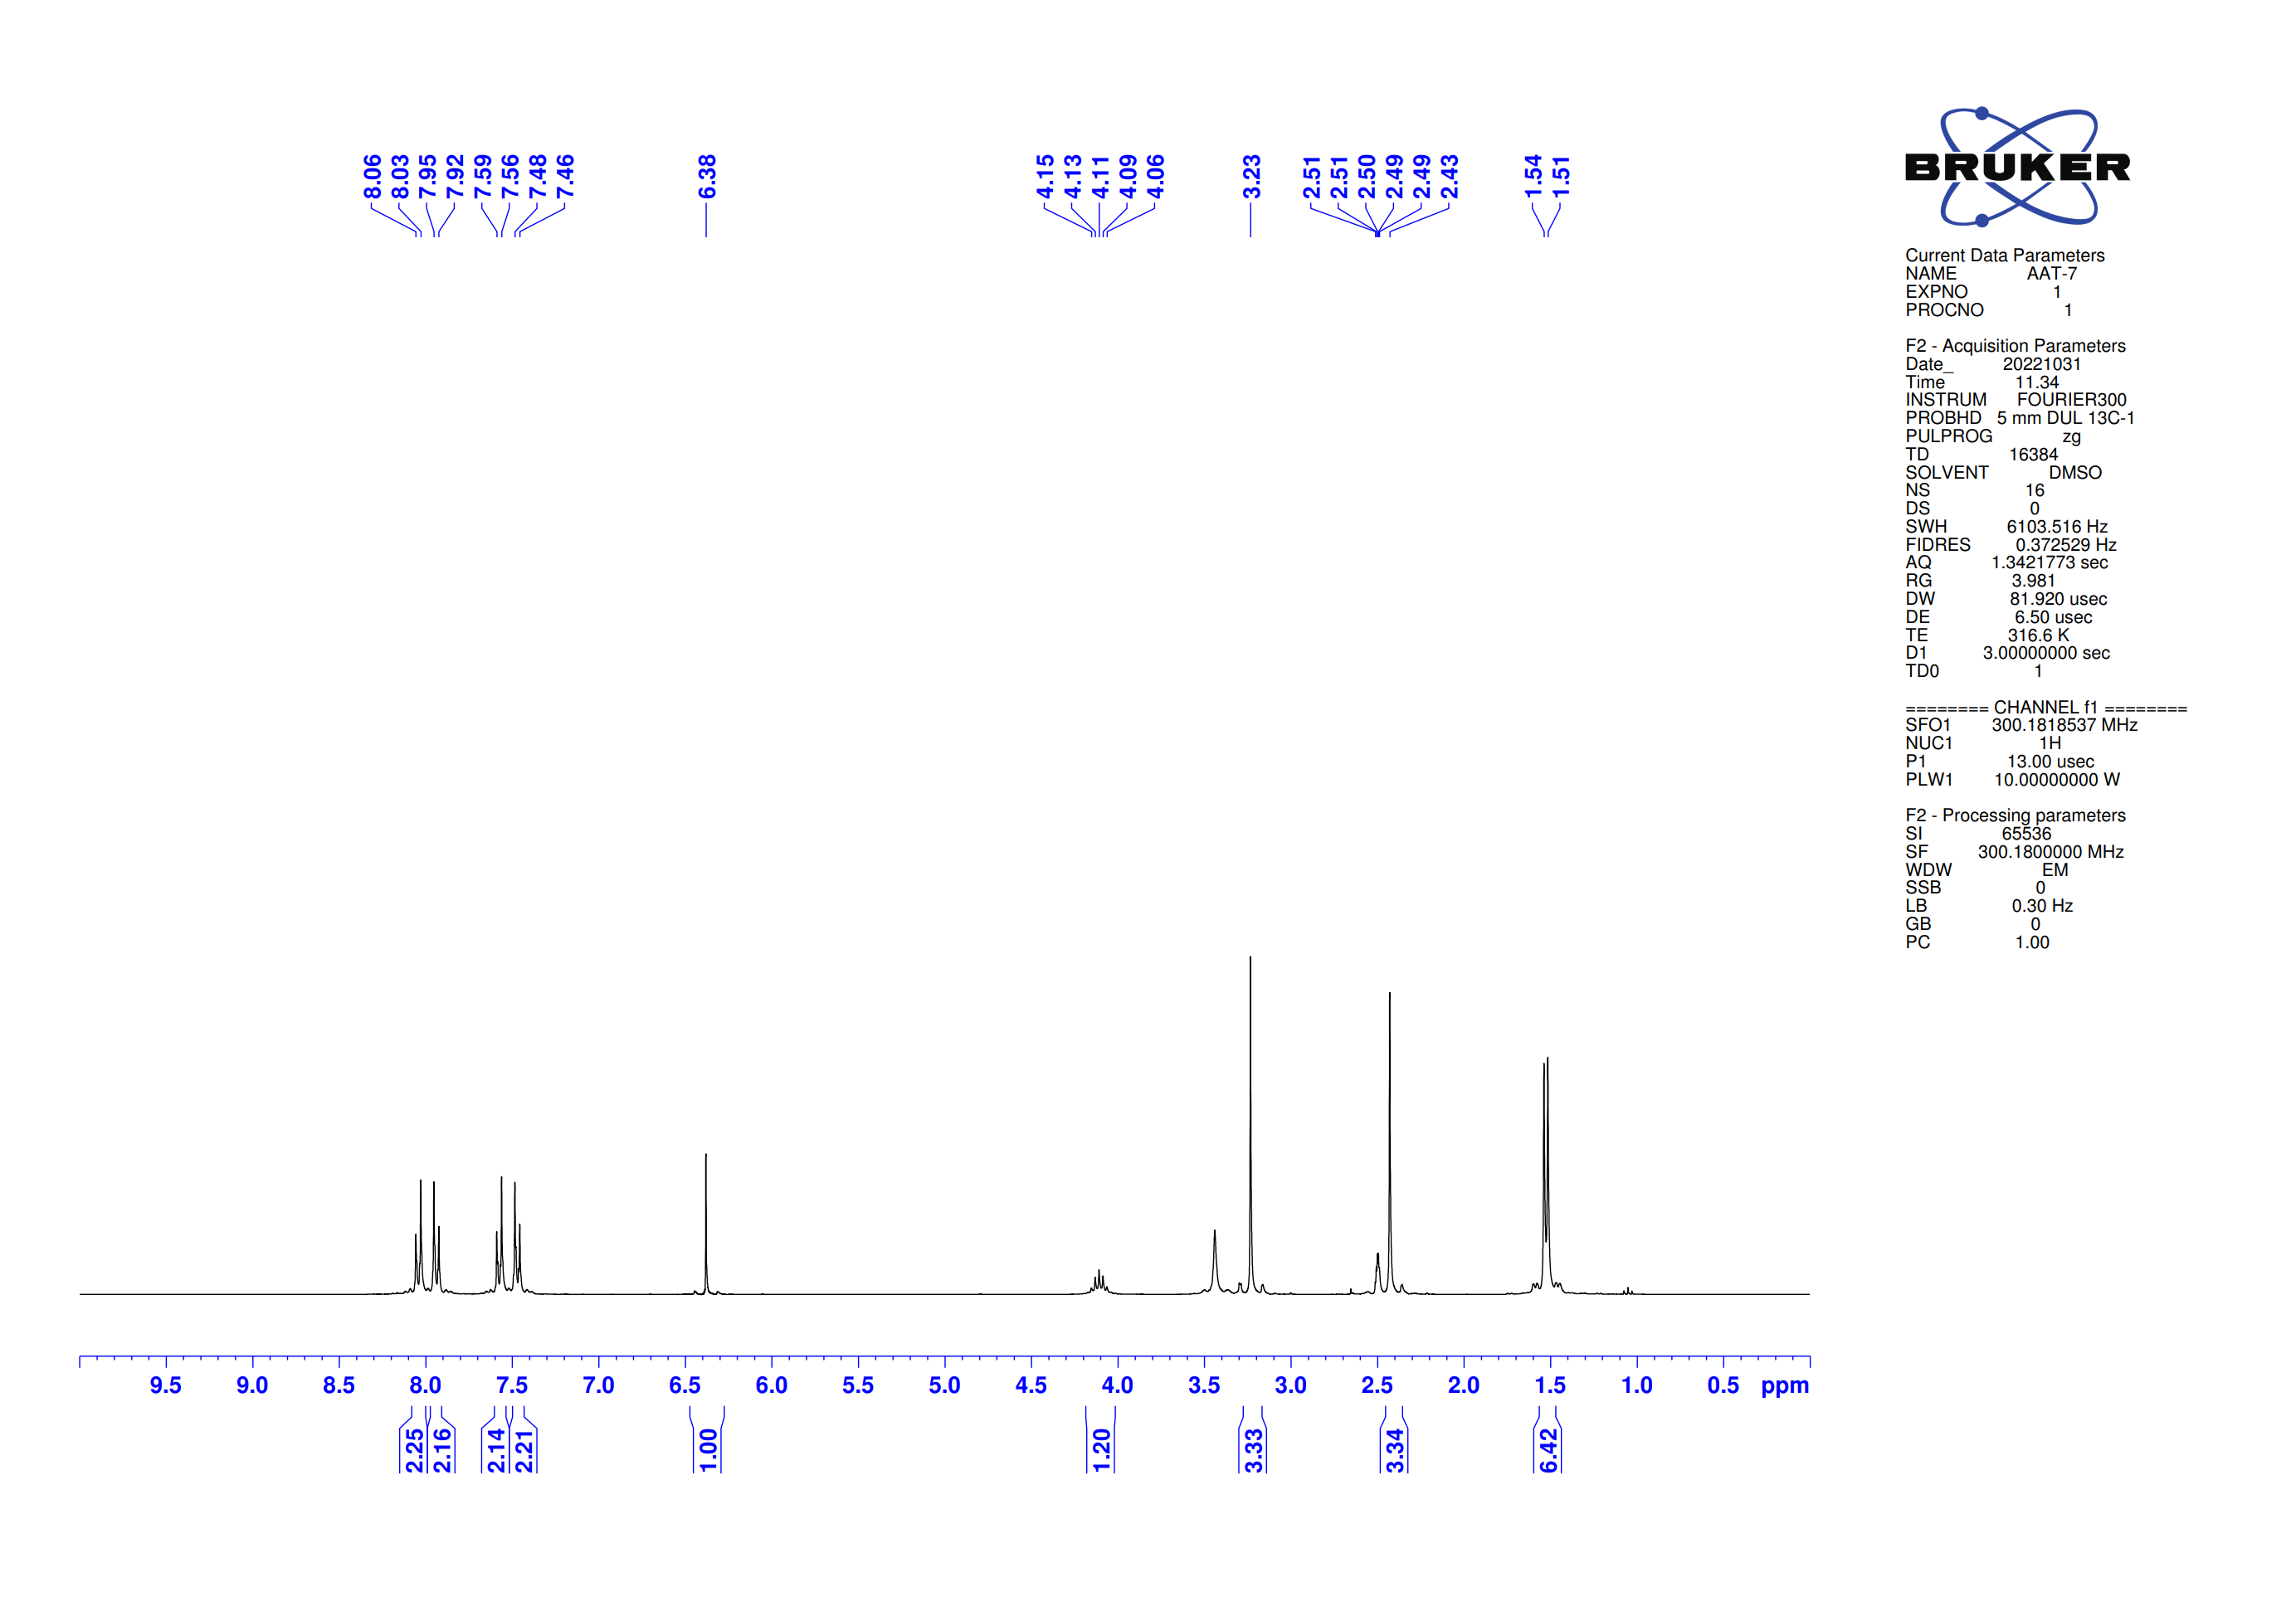


**Figure S16.** 1H-NMR spectrum of compound 3f

**
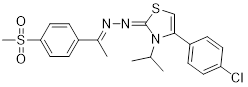
**
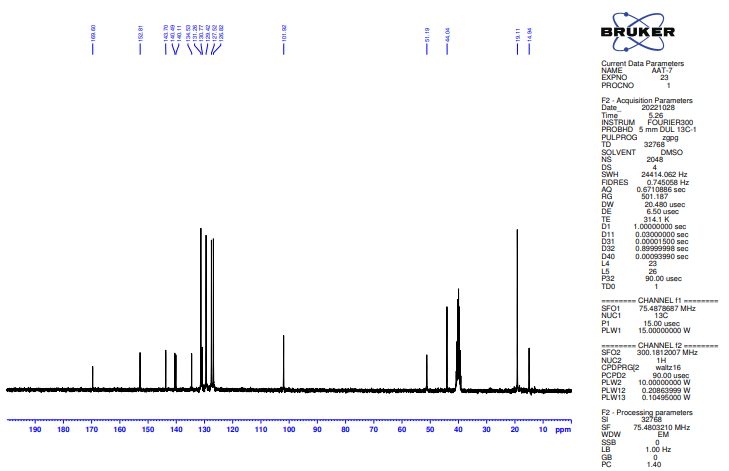


**Figure S17.** 13C-NMR spectrum of compound 3f


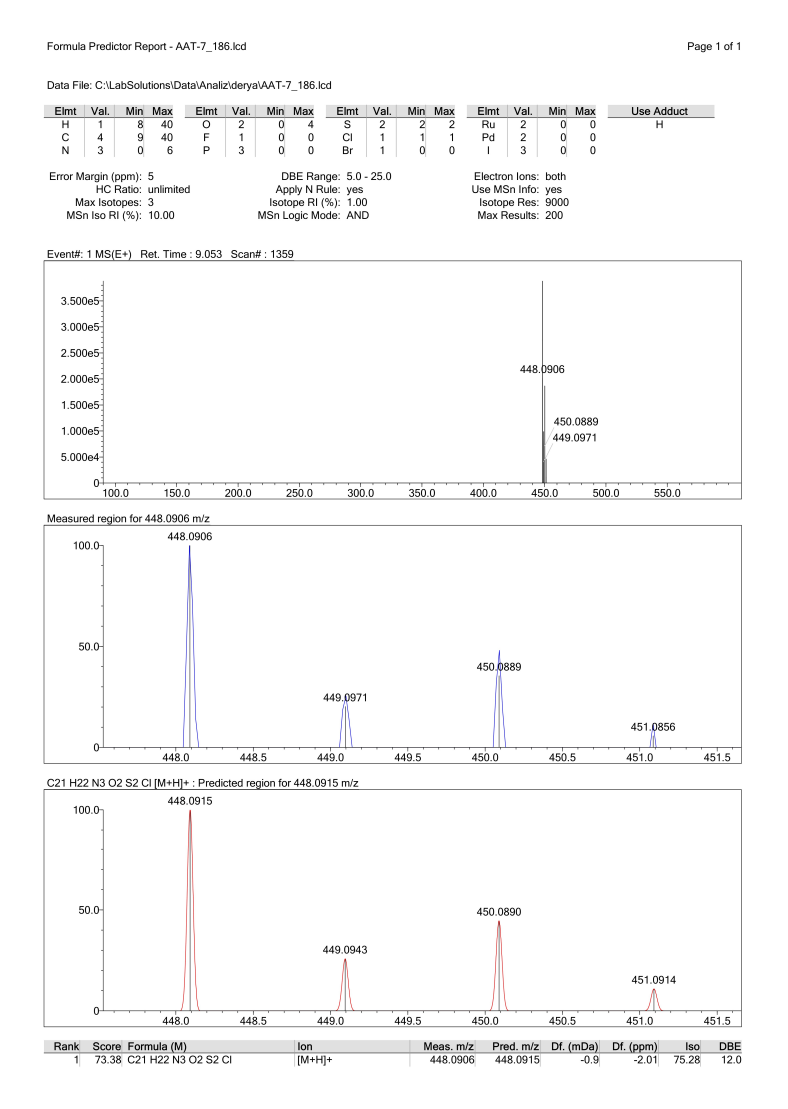


**Figure S18.** HRMS spectrum of compound 3f


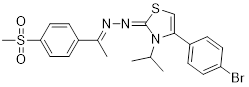

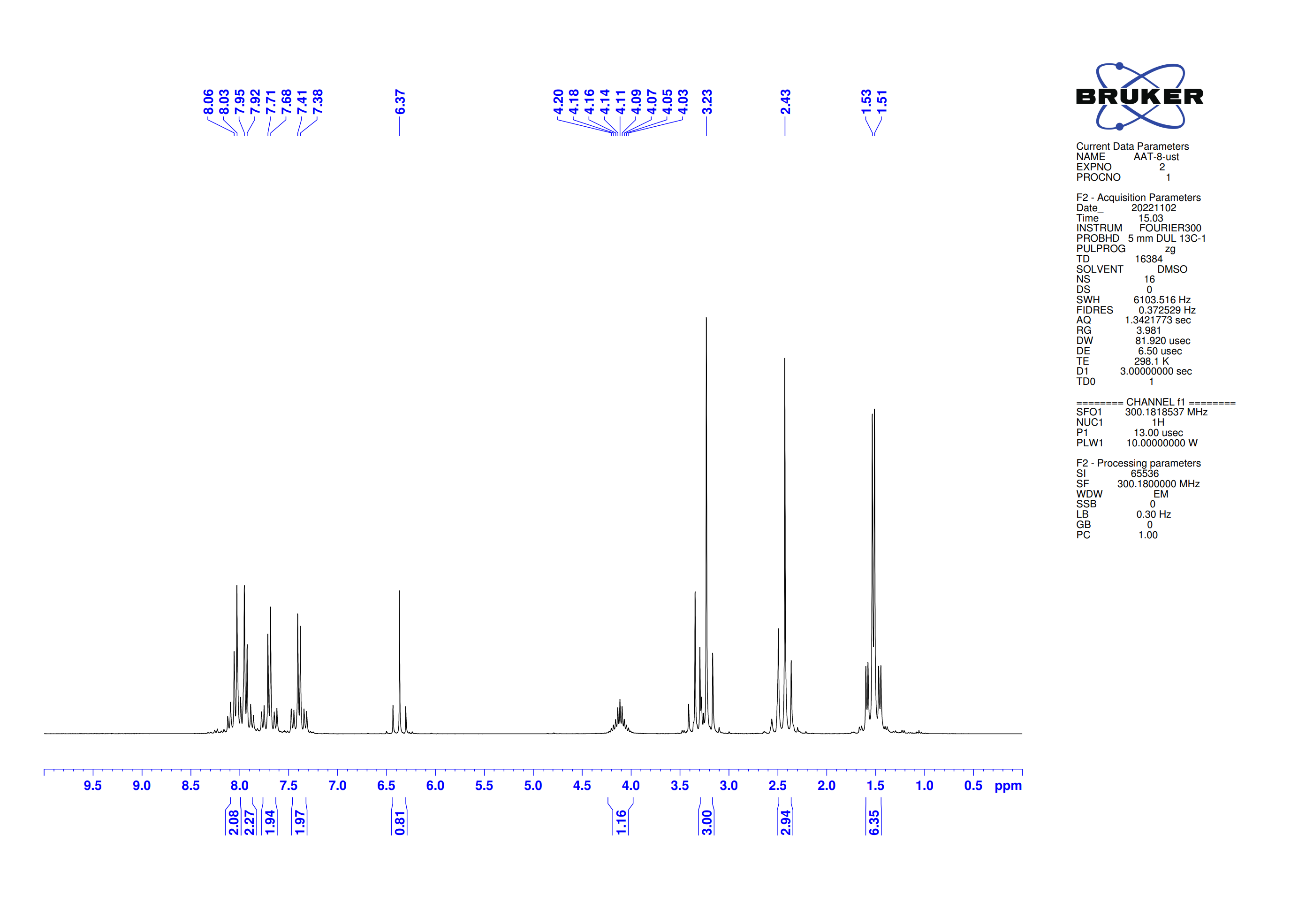
**Figure S19.** 1H-NMR spectrum of compound 3g


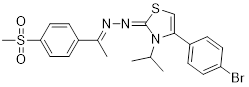

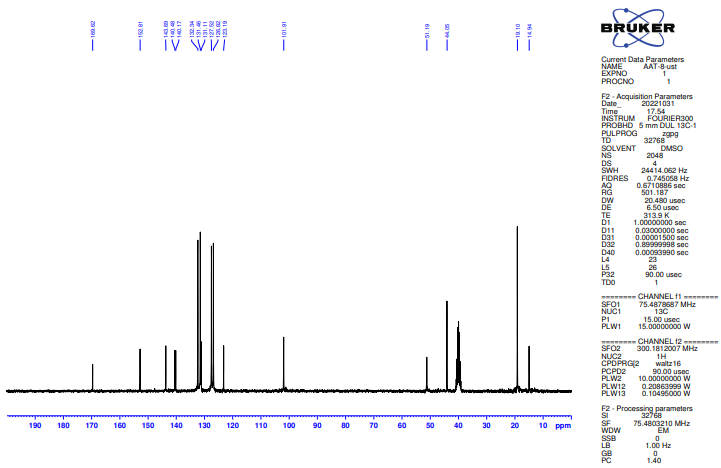


**Figure S20.** 13C-NMR spectrum of compound 3g


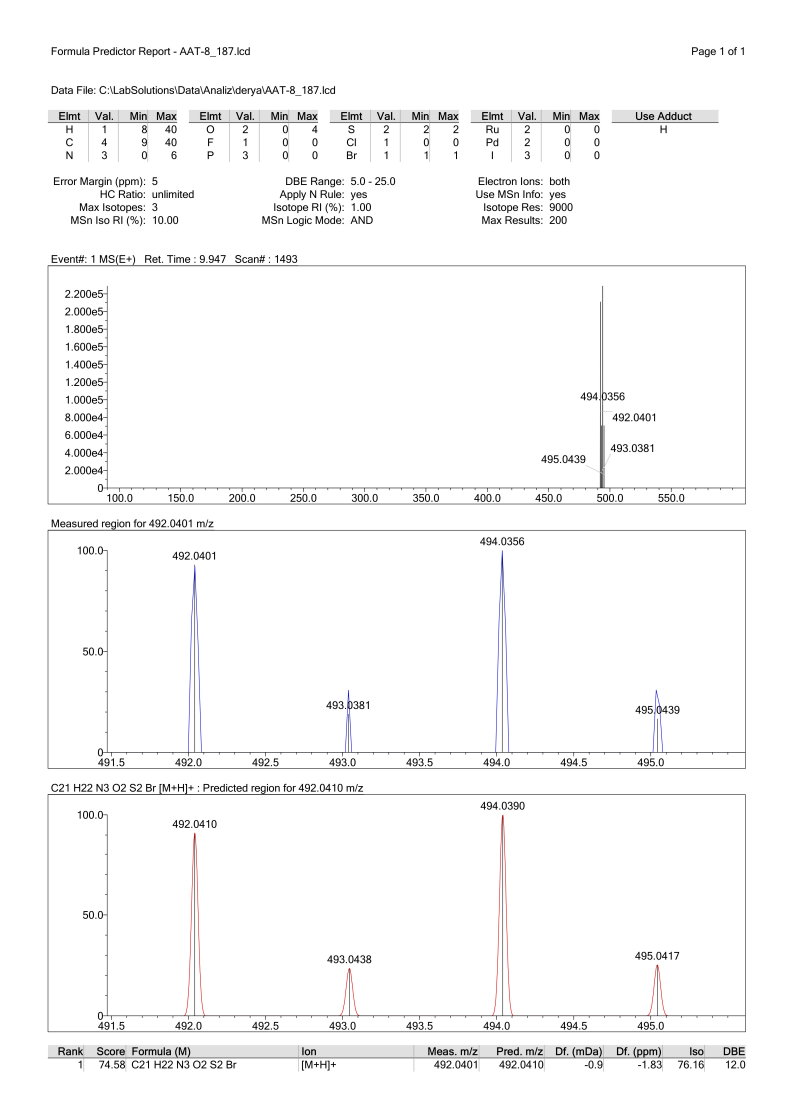


**Figure S21.** HRMS spectrum of compound 3g


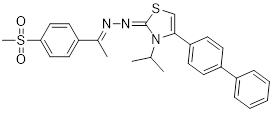

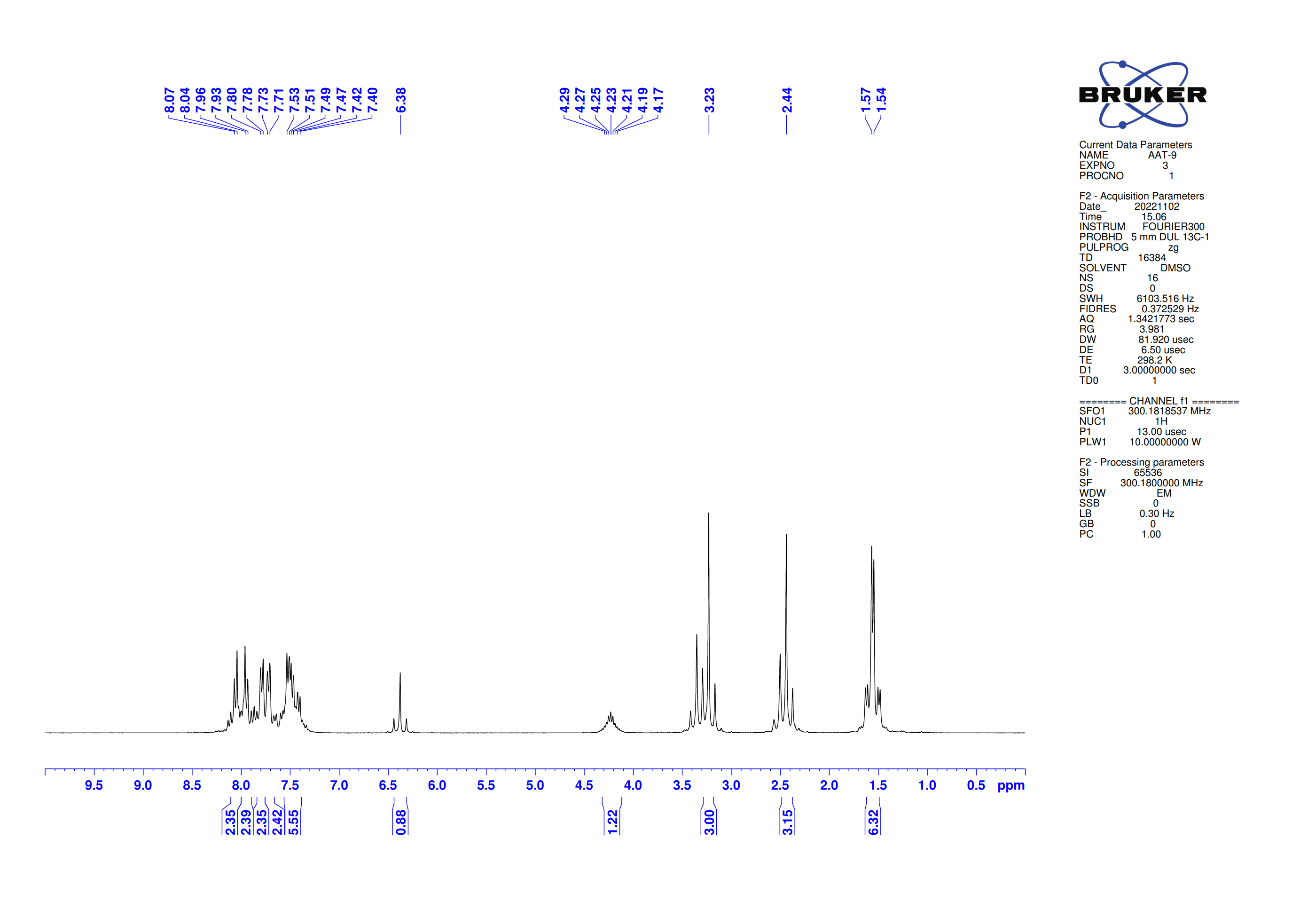
**Figure S22.** 1H-NMR spectrum of compound 3h


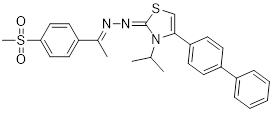

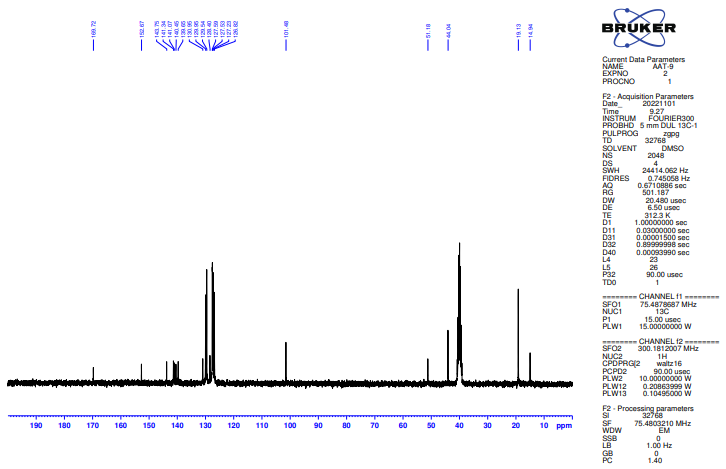


**Figure S23.** 13C-NMR spectrum of compound 3h


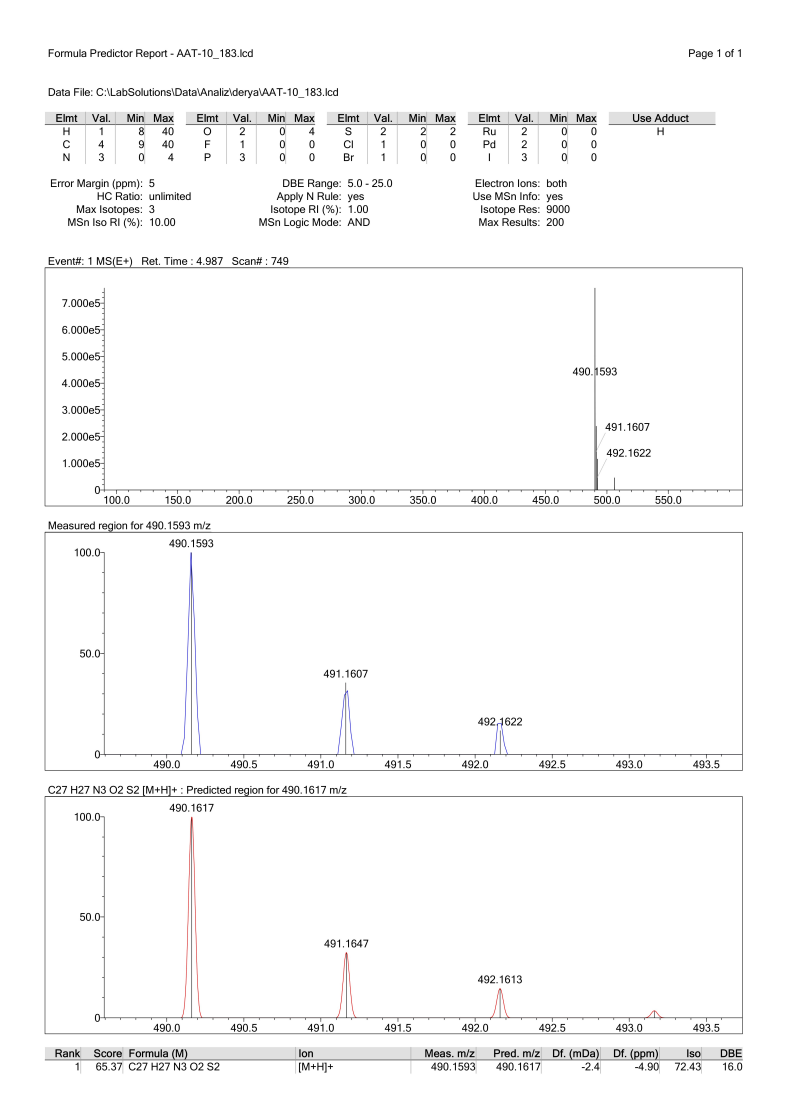


**Figure S24.** HRMS spectrum of compound 3h


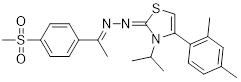

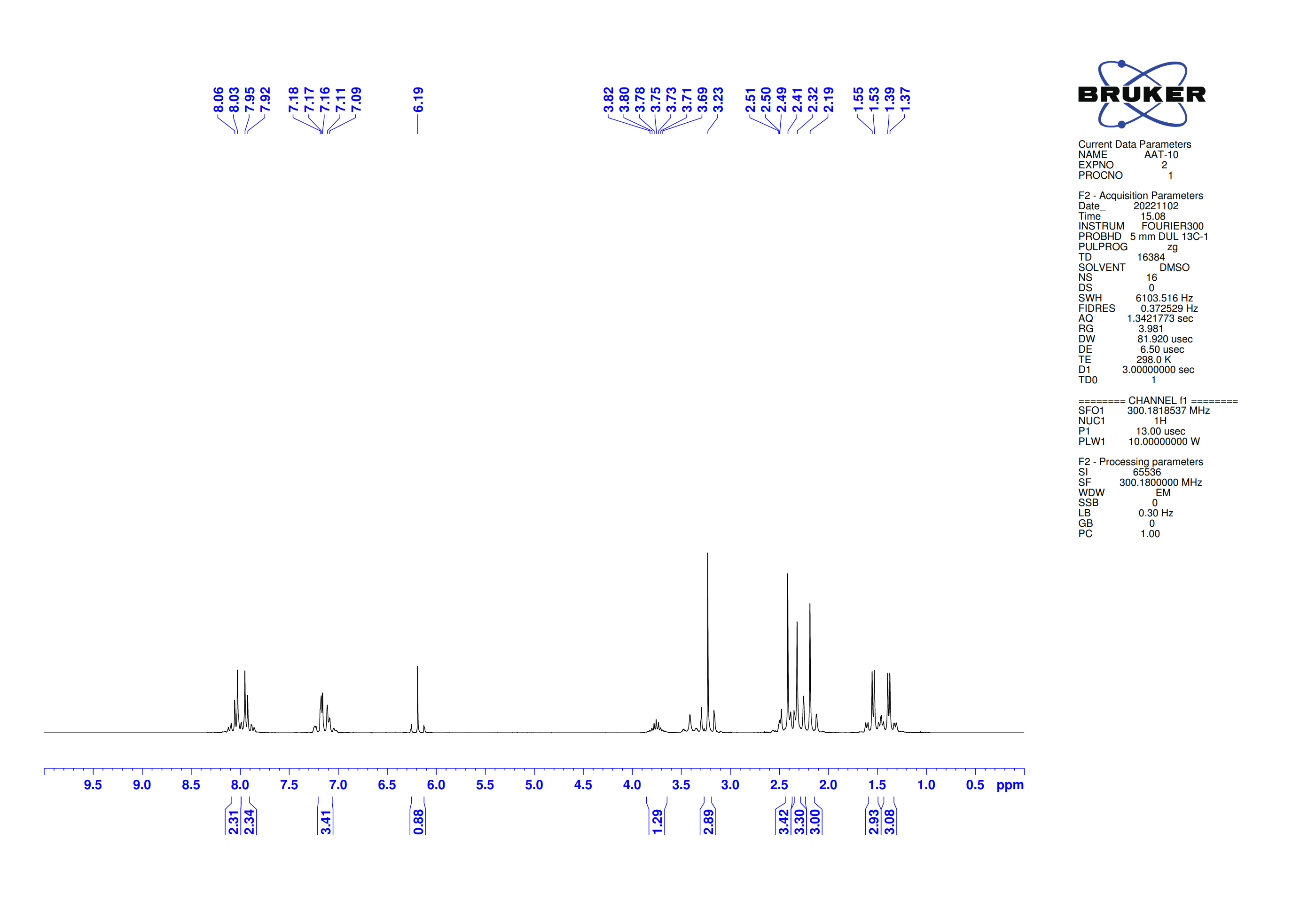
**Figure S25.** 1H-NMR spectrum of compound 3i


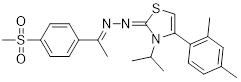

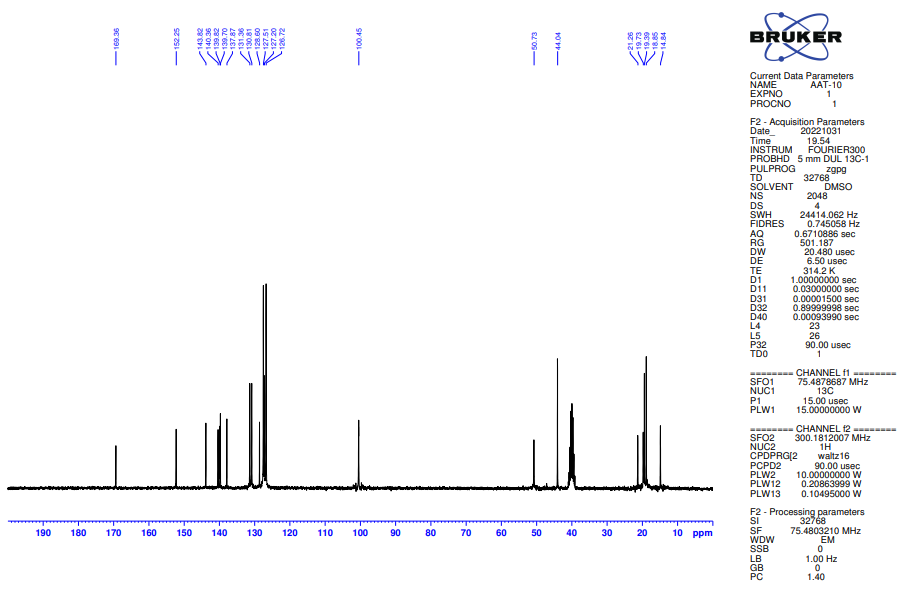


**Figure S26.** 13C-NMR spectrum of compound 3i


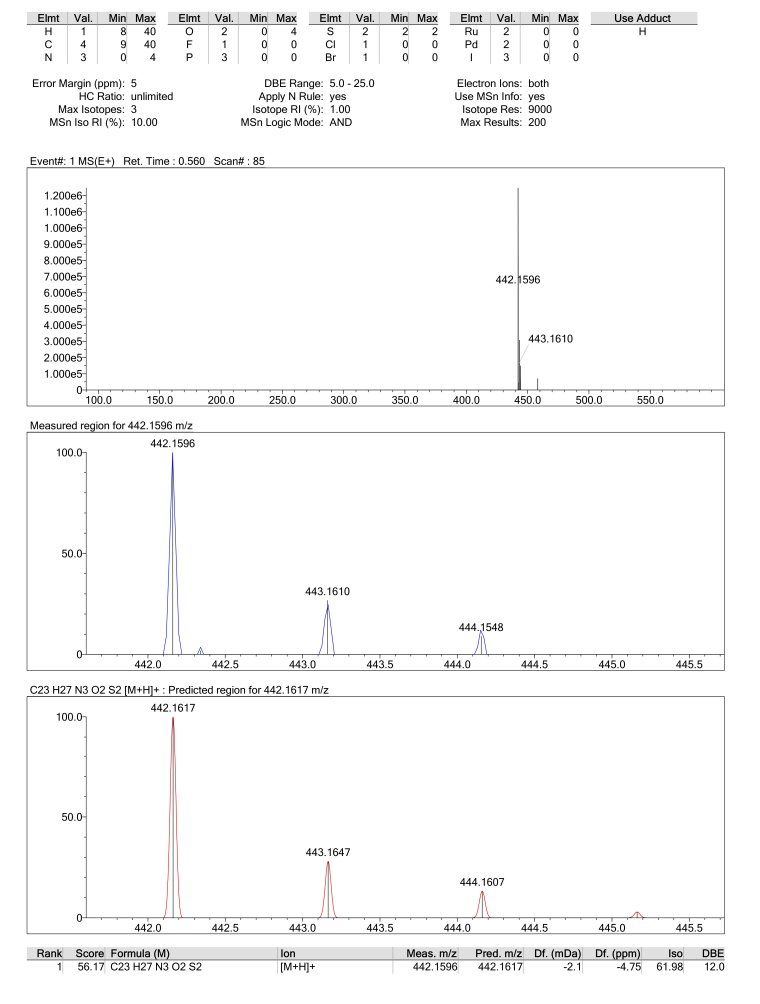


**Figure S27.** HRMS spectrum of compound 3i


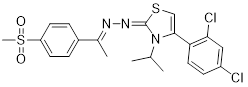

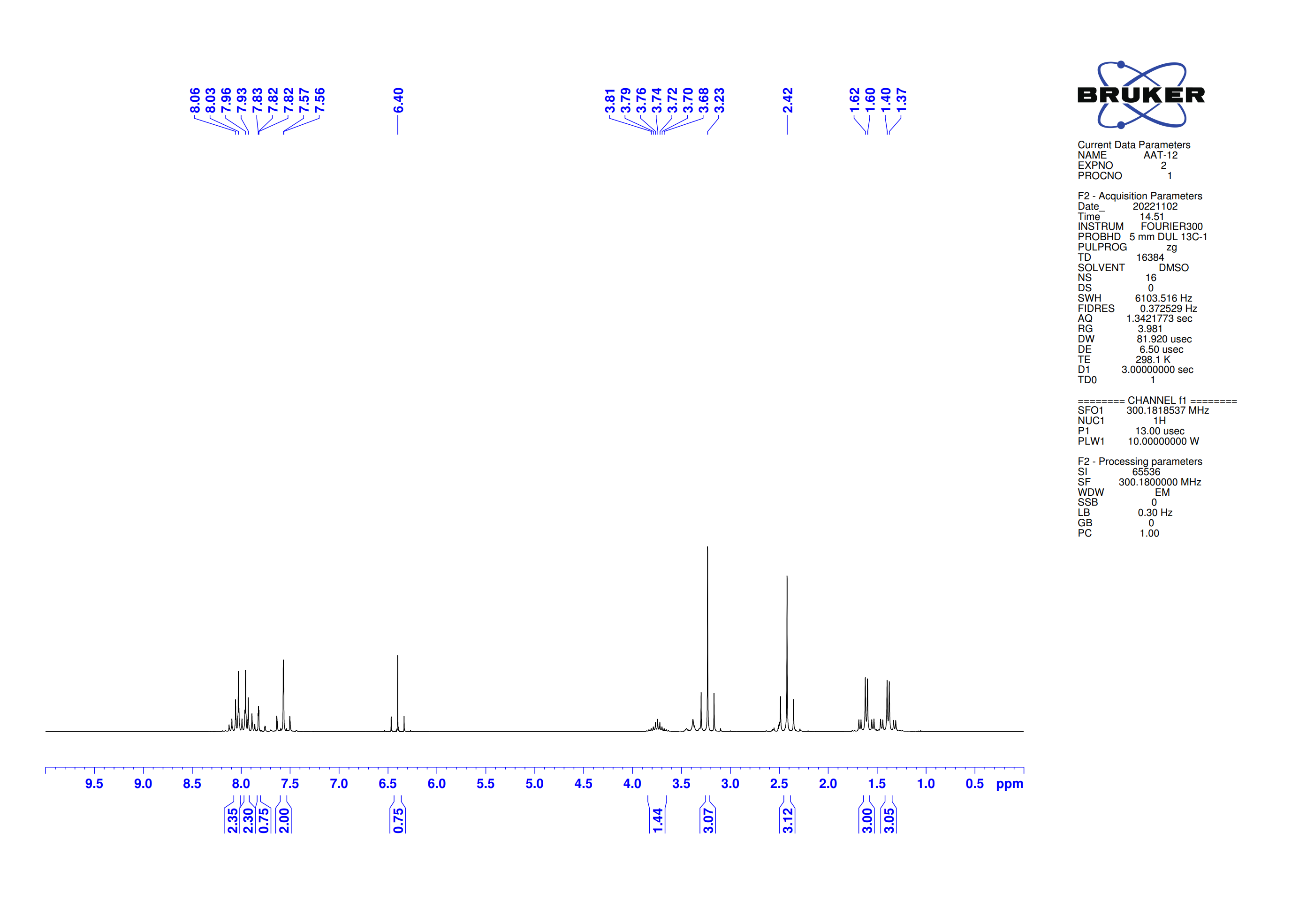
**Figure S28.** 1H-NMR spectrum of compound 3j


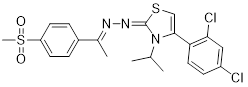

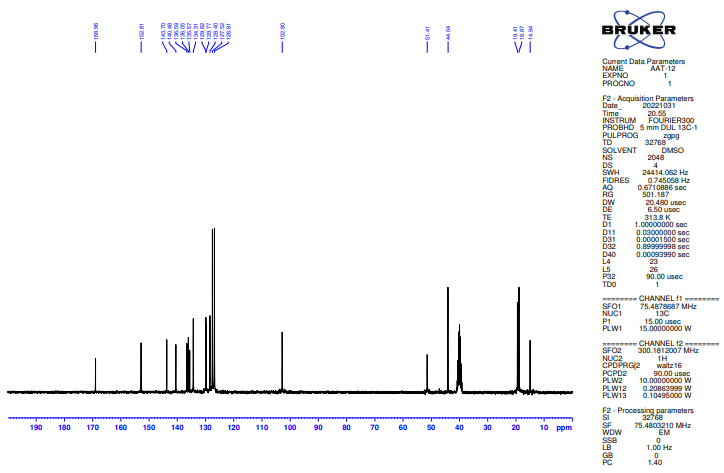


**Figure S29.** 13C-NMR spectrum of compound 3j


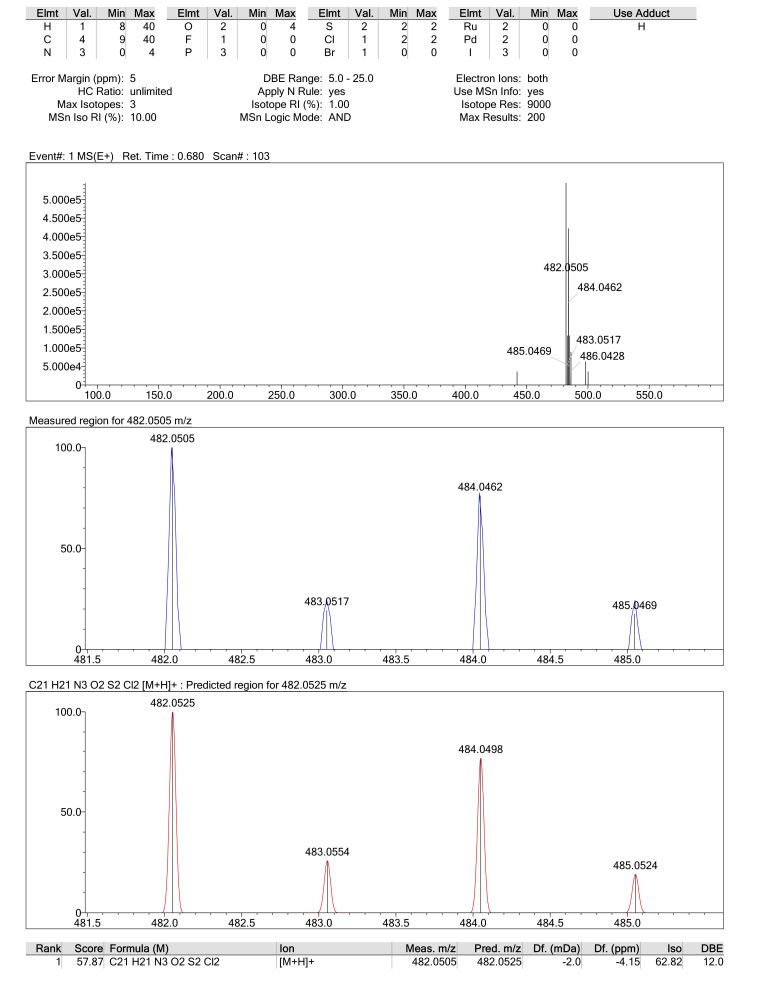


**Figure S30.** HRMS spectrum of compound 3j


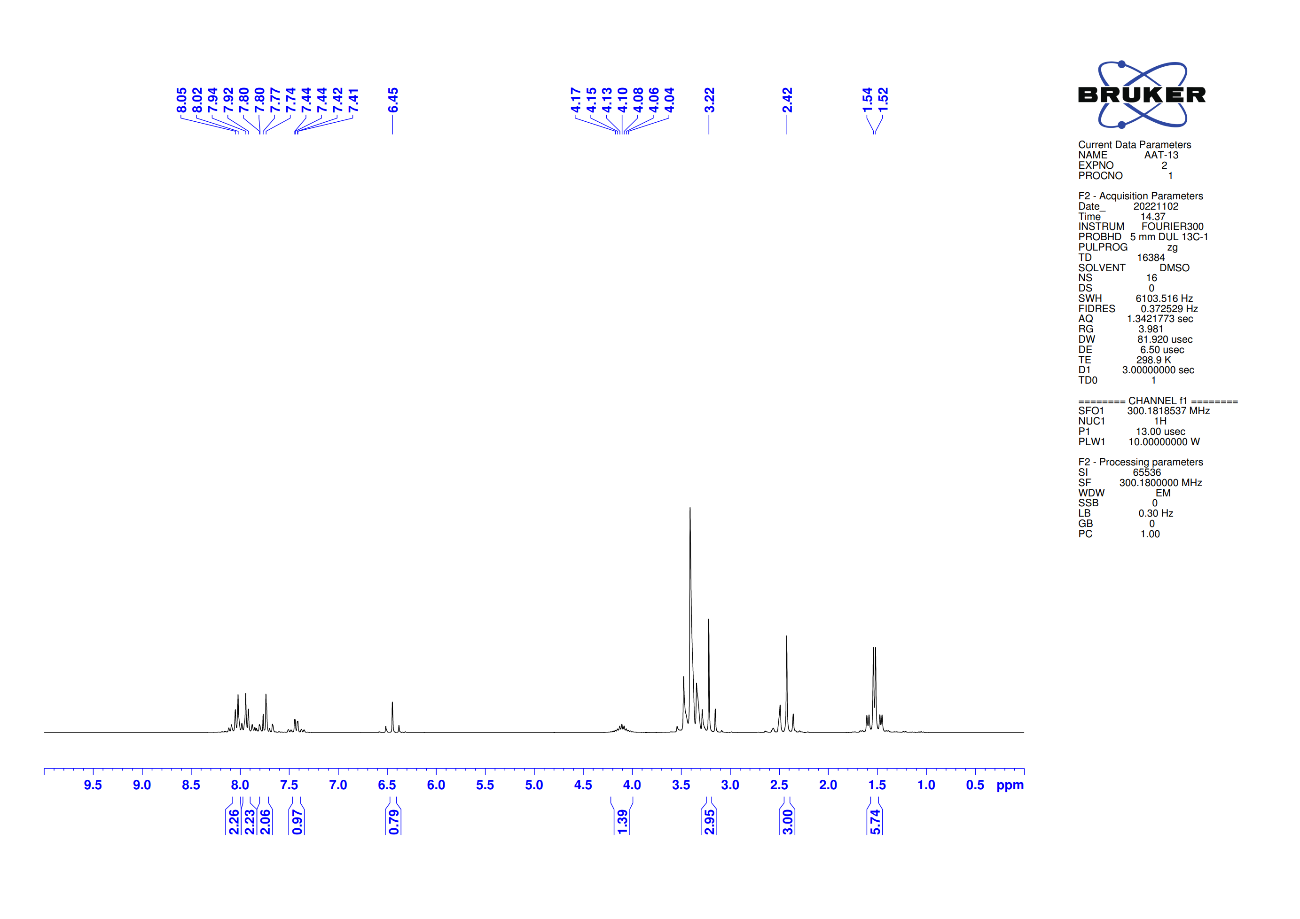

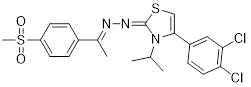


**Figure S31.** 1H-NMR spectrum of compound 3k


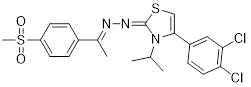

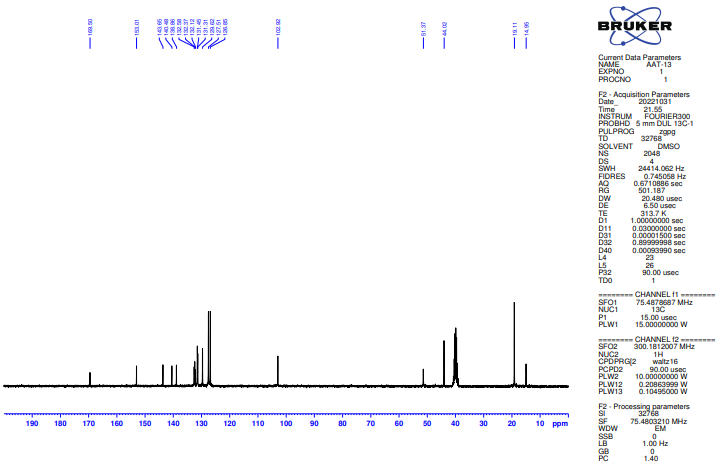


**Figure S32.** 13C-NMR spectrum of compound 3k


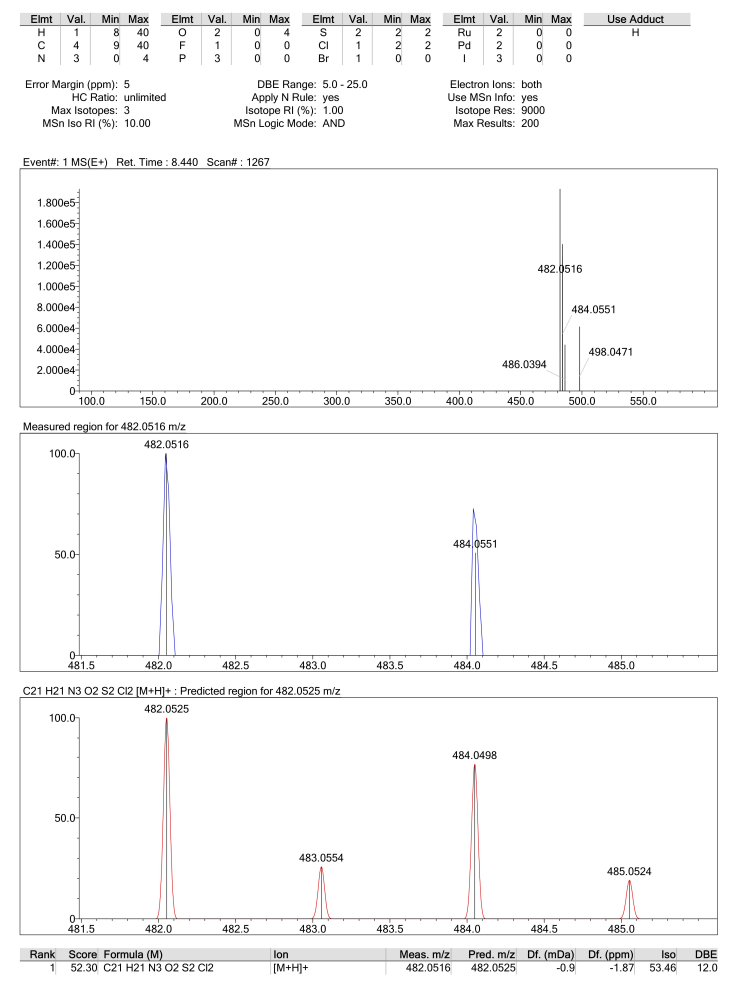


**Figure S33.** HRMS spectrum of compound 3k
